# Supplementary material for: Neuronal Repressor REST Controls Ewing Sarcoma Growth and Metastasis by Affecting Vascular Pericyte Coverage and Vessel Perfusion
Source: PubMed Central journal article supplement (PMC7352345; doi:10.3390/cancers12061405), 2020-05-29

# Supplemental Materials: Neuronal Repressor REST Controls Ewing Sarcoma Growth and Metastasis by Affecting Vascular Pericyte Coverage and Vessel Perfusion

Zhichao Zhou, Yuanzheng Yang, Fei Wang and Eugenie S. Kleinerman

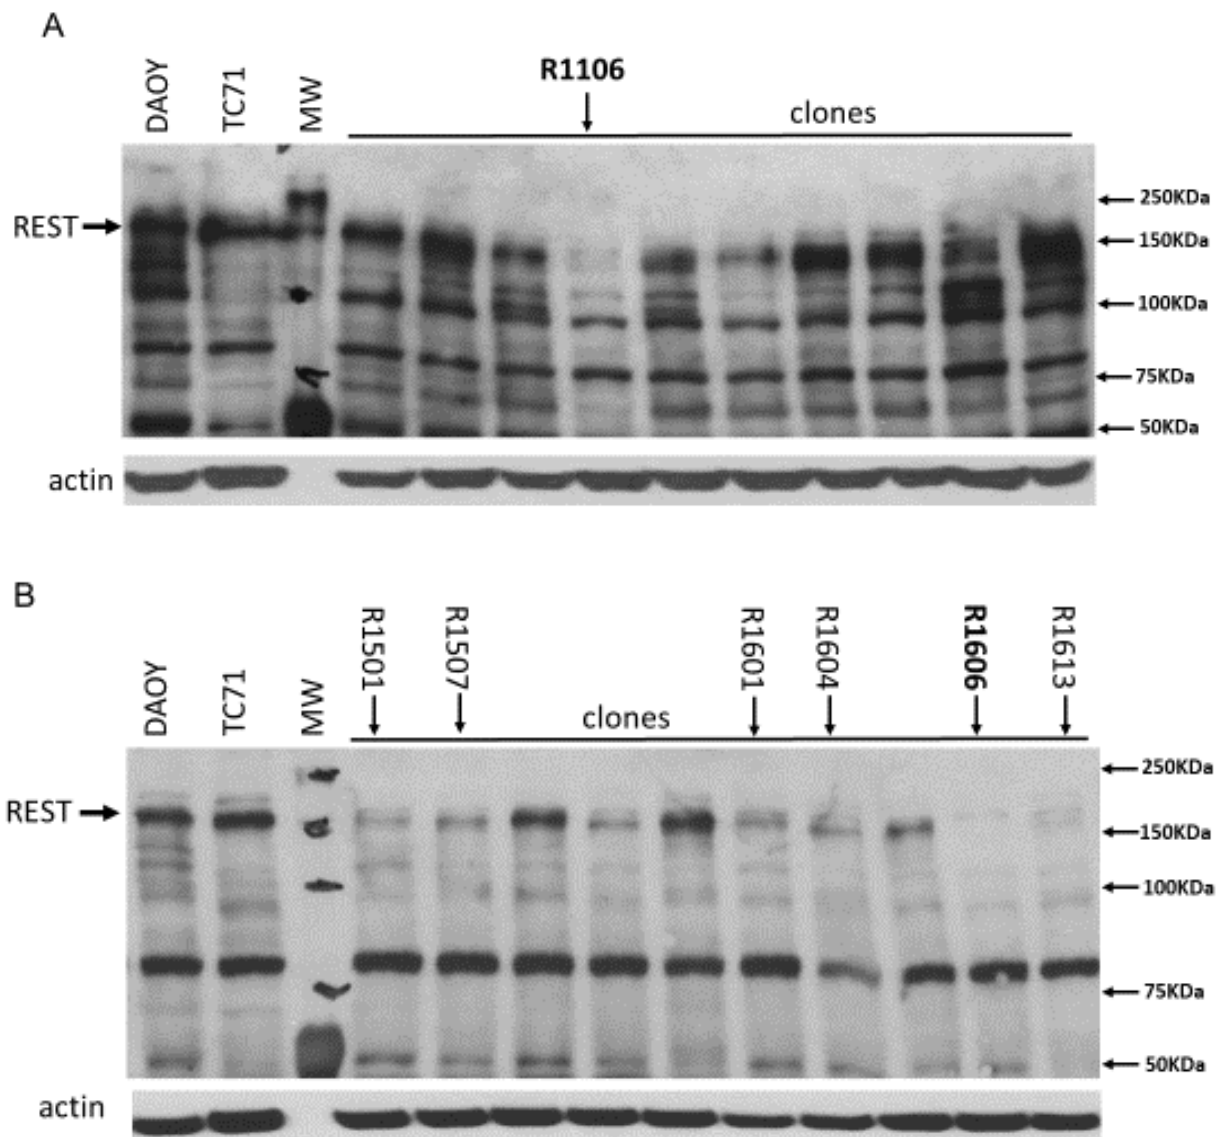

**Figure 1.** Representative WB analysis of CRISPER Clones from (A) single transfection of sgRNA and (B) double transfection of sgRNAs. Lanes pointed by arrow show REST knockout clones.

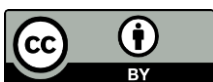

Supplement: cancers-12-01405-s001.pdf [file cancers-12-01405-s001.pdf]
